1 **Title:** Indolergic receptors of the elephant mosquito *Toxorhynchites amboinensis*

2 **Authors:** Dekel Amir, Esther Yakir, Jonathan D. Bohbot

3 **Authors affiliation:** Department of Entomology, The Hebrew University of Jerusalem, Rehovot 76100, Israel

4

5 **Corresponding author:**

6 Jonathan Daniel Bohbot

7 Department of Entomology

8 The Robert H. Smith Faculty of Agriculture, Food and Environment

9 P.O Box 12, Rehovot 76100, ISRAEL

10 Phone: 972-08-9489396

11 Fax: 08-9466768

12 email: [jonathan.bohbot@mail.huji.ac.il](mailto:jonathan.bohbot@mail.huji.ac.il)

### 13 **Abstract**

14 The conservation of the mosquito indolergic receptors across the Culicinae and Anophelinae mosquito  
15 lineages, which spans 200 million years of evolution, is a testament to the central role of indolic compounds  
16 in the biology of these insects. Indole and skatole have been associated with the detection of oviposition sites  
17 and animal hosts. To evaluate the potential ecological role of these two compounds, we have used a  
18 pharmacological approach to characterize homologs of the indolergic receptors *Or2* and *Or10* in the non-  
19 hematophagous elephant mosquito *Toxorhynchites amboinensis*. We provide evidence that both receptors are  
20 narrowly tuned to indole and skatole like their counterparts from hematophagous mosquitoes. These findings  
21 indicate that indole and skatole are operating in a non-animal-host seeking context in *Toxorhynchites* and  
22 underscore the importance of understanding their roles in hematophagous mosquitoes.

23

### 24 **Keywords**

25 Odorant receptor, indole, skatole, mosquito, *Toxorhynchites amboinensis*, indolergic receptor

26

## 27 **1. Introduction**

28 It is well-established that resource-locating mosquito behaviors are mainly mediated by olfactory signals  
29 (Takken and Knols, 1999; Zwiebel and Takken, 2004). However, only a few relevant animal/plant hosts and  
30 oviposition odorants have been identified (Davis and Bowen, 1994). In this regard, the ecological roles of  
31 indole and its close analog skatole (3-methylindole), two nitrogen-containing aromatic compounds, are  
32 complex (Figure 1A). Indole and skatole alone or as a mixture, have been proposed to act as oviposition  
33 attractants in *Aedes aegypti* (Baak-Baak et al., 2013), *Culex* spp. (Beehler et al., 1994; Blackwell et al., 1993;  
34 Du and Millar, 1999; Mboera and Takken, 1999; Millar et al., 1994; 1992; Mordue et al., 1992) and *Anopheles*  
35 *gambiae* (Lindh et al., 2008). These two compounds, products of the metabolic activity of the microflora, are  
36 present in significant amount in mammalian waste products (Garner et al., 2007; Yokoyama and Carlson,  
37 1979), human skin (Bernier et al., 2000; 2002) and human sweat (Meijerink et al., 2000), which indicate they  
38 may also act as animal-host attractants (Cork, 1996). Indole is a ubiquitous component of flower scents of  
39 many plant families (Knudsen et al., 2006) and it has been identified from host plants of *Ae. aegypti* and *An.*  
40 *gambiae* (Nyasembe et al., 2018).

41 Both indole and skatole are electrophysiologically active compounds detected by the antennae of *Ae.*  
42 *aegypti* (Siju et al., 2010), *C. quinquefasciatus* (Du and Millar, 1999) and *An. gambiae* (Blackwell and  
43 Johnson, 2000; Meijerink et al., 2000; 2001; Qiu et al., 2006). Two highly conserved odorant receptors (ORs),  
44 OR2 and OR10, are highly sensitive and selective towards indole and skatole, respectively in *Ae. aegypti*  
45 (Bohbot et al., 2011), *C. quinquefasciatus* (Hughes et al., 2010; Pelletier et al., 2010) and *An. gambiae* (Carey  
46 et al., 2010; Wang et al., 2010). The *Or2* and *Or10* genes are expressed in the antennae of adult male and  
47 female mosquitoes, while *Or2* is only expressed in the antennae of larvae along with a third paralog named  
48 *Or9*. The functional conservation of these receptors across the two mosquito subfamilies in both sexes and in  
49 larvae suggest that indole and skatole play important and multiple roles in the biology of these insects (Figure  
50 1A) (Cork, 1996; Nyasembe et al., 2018).

51 Our objective was to explore the role of these two compounds in the context of animal-host selection by  
52 functionally characterizing candidate homologs of the indole and skatole receptor genes in the non-

53 hematophagous elephant mosquito *Toxorhynchites amboinensis*. Lack of functional conservation would argue  
54 the case for a role of the OR2-indole and OR10-skatole pairs in animal-host seeking in hematophagous insects.  
55 Our study shows that *T. amboinensis* OR2 (TaOR2) and OR10 (TaOR10) share high sequence identity with  
56 their *Aedes* counterparts in support of a highly conserved role in mosquitoes outside animal-host seeking. We  
57 provide pharmacological evidence that the elephant mosquito TaOR2 and TaOR10 are indole and skatole  
58 receptors operating in a non-animal host context, including oviposition site selection and/or plant-host-  
59 seeking.

60

## 61 **2. Materials and Methods**

### 62 2.1. Cloning *TaOr* genes and sequence analyses.

63 Cloning and sequencing of *TaORco* was described elsewhere (Dekel et al., 2016a). *TaOr2* and *TaOr10*  
64 were custom-synthesized (Bio Basic Inc., Markham Ontario, Canada), subcloned into into the pENTR™  
65 vector using the Gateway<sup>R</sup> directional cloning system (Invitrogen Corp., Carlsbad, CA, USA) and subcloned  
66 into the *Xenopus laevis* expression destination vector pSP64t RFA. Plasmid purification was carried out using  
67 the The ZR Plasmid Miniprep™-Classic (Zymo Research, Irvine, CA, USA) and sequenced by MacroGen  
68 Europe (Amsterdam, the Netherland). DNA and amino-acid sequences for *TaOr2*, *TaOr10* and *TaORco* have  
69 previously been published (Zhou et al., 2014) and can be accessed at Figshare  
70 ([https://figshare.com/articles/Transcriptome\\_assembly\\_of\\_T\\_ambionsis/2182684/2](https://figshare.com/articles/Transcriptome_assembly_of_T_ambionsis/2182684/2), last accessed on Dec 26,  
71 2018).

72 Amino-acid sequence alignments (Supplementary Figure 1) were executed using MAFFT version 7  
73 (Nakamura et al., n.d.). Phylogenetic analysis was performed using the neighbor-joining statistical function  
74 and 10,000 Bootstrap replications of the MEGA 7 software (Kumar et al., 2016).

75

### 76 2.2. Chemical reagents.

77 For establishing the tuning curve, we used 30 odorants, including 19 compounds from Sigma-Aldrich  
78 (Milwaukee, WI, USA), including 1-hepten- 3-ol (CAS 4938-52-7), 3-methylbutanol (CAS 123-51-3), *E*-2-

79 hexen-1-al (CAS 6728-26-3), heptaldehyde (CAS 111-71-7), octanal (CAS 124-13-0), propyl-acetate (CAS  
80 109-60-4), 3-octanone (CAS 106-68-3), 6-methyl-5-hepten-2-one (CAS 110-93-0), 2,4,5-trimethylthiazole  
81 (CAS 13623-11-5), diallyl-sulfide (CAS 2179-57-9), benzaldehyde (CAS 100-52-7), indole (CAS 83-34-1),  
82 histamine (CAS 51-45-6), (+)-limonene oxide (CAS 203719-54-4), geranyl-acetate (CAS 105-87-3), (+)-  
83 fenchone (CAS 4695-62-9), 2-oxopentanoic acid (CAS 1821-02-9), ( $\pm$ )-1-octen-3-ol (CAS 3391-86-4) and 3-  
84 methylindole (CAS 83-34-1); 7 compounds from Merck (Darmstadt, Germany), including methyloctanoate  
85 (CAS 111-11-5), ethyl-hexanoate (CAS 123-66-0), 2-heptanone (CAS 110-43-0), dimethyl-sulfide (CAS  
86 2179-57-9), tryptamine (CAS 61-54-1), octanoic-acid (CAS 124-07-2) and D-glucuronolactone (CAS 32449-  
87 92-6); 2 compounds from Acros Organics (Thermo Fisher Scientific, Waltham, MA, USA), including methyl-  
88 salicylate (CAS 119-36-8) and octopamine (CAS 770-05-8); and 2 compounds from Alfa-Aesar (Ward Hill,  
89 MA, USA), including L-lactic acid (CAS 79-33-4) and  $\delta$ -Decalactone (CAS 705-86-2).

90

91 2.3. Two-electrode voltage clamp electrophysiological recording of *Xenopus* oocytes expressing TaOR2,  
92 TaOR10 and TaORco.

93 The methodologies and protocols used in this study have been described elsewhere (Bohbot and Dickens,  
94 2009). Briefly, *TaOr2*, *TaOr10* and *TaORco* cRNA were synthesized using linearized pSP64tRFA expression  
95 vectors as template for in vitro transcription according to the instructions of the mMMESSAGE mMACHINE®  
96 SP6 Transcription Kit (ThermoFisher Scientific). Stage V-VI oocytes were manually separated and  
97 enzymatically defolliculated using a 1 mg/mL collagenase (Sigma-Aldrich, Milwaukee, WI, USA) solution  
98 (calcium-free ND96 buffer, [pH 7.6]) for 40-50 min at 18 °C. Oocytes were then successively washed in  
99 calcium-free ND96 and gentamycin-supplemented (10 mg/mL, Sigma-Aldrich, Milwaukee, WI, USA)  
100 calcium-free ND96. Oocytes were then washed and incubated in ND96 buffer supplemented with cal-  
101 cium (0.1 M), 5% heat-inactivated horse serum (ThermoFisher Scientific), 50 mg/ml tetracycline (Carl Roth  
102 GmbH), 100 mg/ml streptomycin (Sigma-Aldrich, Milwaukee, WI, USA) and 550 mg/ml sodium pyruvate  
103 (Sigma-Aldrich, Milwaukee, WI, USA) for four to five days. Oocytes were injected with 27.6 nL (27.6 ng of  
104 each cRNA) of RNA using the Nanoliter 2010 injector (World Precision Instruments, Inc., Sarasota, FL,

105 USA). Odorant-induced currents of oocytes expressing *TaOr2/10* and *TaORco* were recorded using the two-  
106 microelectrode voltage-clamp technique (TEVC). The OC-725C oocyte clamp (Warner Instruments, LLC,  
107 Hamden, CT, USA) maintained a  $-80$  mV holding potential.

108 For the establishment of concentration-response curves, oocytes were exposed to indole or skatole alone  
109 ( $10^{-10}$  M to  $10^{-4}$  M). Data acquisition and analysis were carried out with the Digidata 1550 A digitizer and  
110 pCLAMP10 software (Molecular Devices, Sunnyvale, CA, USA).

111 The tuning curve was generated using a panel of 30 odorants including indole, skatole and other  
112 compounds known to elicit physiological or behavioral responses in mosquitoes. All chemicals used were  
113 administered at 90 nM, which approximates the  $EC_{50}$  of indole and skatole. All the data analyses were  
114 performed using GraphPad Prism 7 (GraphPad Software Inc., La Jolla, CA, USA).

115

### 116 **3. Results**

#### 117 3.1. TaOR2 and TaOR10 are highly conserved.

118 The antennae of *Toxorhynchites amboinensis* express two highly conserved indolergic receptor homologs  
119 (TaOR2 & TaOR10). Multiple sequence alignments and phylogenetic analyses show that they share about 80%  
120 amino-acid identity with their *Aedes* counterparts (Figure 1b). TaOR2 and AaOR2 encode 376 amino-acid  
121 proteins sharing 82.67% overall sequence identity. TaOR10 and AaOR10 encode 375 amino-acid proteins,  
122 which share 78.34% amino-acid identity. The OR10 alignment requires only one gap to be introduced  
123 (Supplementary Figure 1). Amino-acid divergence is evenly distributed throughout the peptide sequence.  
124 Both TaOR2 and TaOR10 grouped with their *Aedes* counterparts supported by bootstrap support with values  
125 above 95%.

126

#### 127 3.2. TaOR2 and TaOR10 are highly sensitive to indolic compounds.

128 Our next question was to investigate whether the observed sequence conservation determined functional  
129 orthology. To do so we expressed both receptors in the frog *Xenopus* oocyte system for pharmacological  
130 characterization.

131 Because *Aedes* and *Anopheles* OR2 are highly sensitive to indole (Bohbot et al., 2011; Wang et al., 2010),  
132 we challenged TaOR2 with ten-fold increasing concentrations of this odorant and skatole, a methylated analog  
133 of the former. Like its *Aedes* counterparts, TaOR2 proved to be a challenging receptor to express in *Xenopus*  
134 oocytes as it consistently generates comparatively lower currents than other mosquito ORs such as OR10 or  
135 OR8 (Figure 2A). The resulting concentration-response relationships derived from the maximum amplitudes  
136 elicited by each tested concentrations provided EC<sub>50</sub> values of 88 nM for indole and 1,380 nM for skatole  
137 (Figure 2B). Indole was about 15 times more potent than skatole and the indole dynamic concentration range  
138 occurred in the nanomolar range.

139 We applied the same approach to TaOR10 informed by the sensitivity of AaOR10 towards skatole (Bohbot  
140 and Dickens, 2012). Indeed, AaOR10 dynamically responds to skatole in the nM range while it is much less  
141 sensitive to indole (mM range). TaOR10 consistently generated robust and larger currents than the TaOR2  
142 paralog (Figure 2A). The relative potency of indole and skatole was however reversed with TaOR10 being  
143 105 times more sensitive to skatole (EC<sub>50</sub> = 87 nM) than to indole (EC<sub>50</sub> = 9,163 nM) (Figure 2B).

144

145 3.3. TaOR2 and TaOR10 are narrowly tuned to indole and skatole, respectively.

146 We further tested the odorant selectivity of these two receptors using a panel of 30 compounds belonging  
147 to diverse chemical classes, including alcohols, aldehydes, esthers, ketones, sulfur compounds, aromatics,  
148 amines, terpenes, carboxylic acids and lactones (Dekel et al., 2016b) (Figure 3B). In order to avoid receptor  
149 adaptation, antagonist effects and technical artefacts such as broad molecular receptive ranges (Bohbot and  
150 Pitts, 2015) associated with high chemical concentrations (Bohbot and Pitts, 2015), the screens were carried  
151 out at low 90 nM odorant concentration, which nearly corresponds to the EC<sub>50</sub> values of the TaOR2-indole  
152 and TaOR10-skatole pairs. We controlled for possible position effects by administering odorant sets in reverse  
153 order (Supplementary Figure 2). At this concentration, indole and skatole elicited the strongest responses for  
154 their respective cognate receptors (Figure 3A). We did not observe any modulation of receptor activity in  
155 response to the cognate ligands at the end of the recording sessions.

156 Overall, TaOR2 exhibited a medium response profile with a kurtosis value of 19 (Figure 3B). TaOR10 was

157 narrowly tuned to skatole with a maximal kurtosis value of 30. These findings confirm the selectivity of these  
158 two receptors for skatole and indole, respectively. The activation of TaOR2 elicited by indole was 2.7 times  
159 greater than the next most potent odorant ((±)-1-octen-3-ol) and 3.8 times greater than the third most active  
160 odorant (methyl-octanoate). The activation of TaOR10 by skatole was 23.1 times higher than the next most  
161 activating odorant (3-octanone) and 29 times greater than indole.

162

#### 163 **4. Discussion**

164 It is unclear whether indole and skatole act as oviposition or as animal-host (Cork, 1996; Millar et al.,  
165 1992). To complicate the matter, these benzenoid compounds participate to the flower scent of plants (Jürgens  
166 et al., 2010; Smith and Meeuse, 1966) and are preferred by *Ae. aegypti* in the context of plant-host attraction  
167 (Nyasembe et al., 2018). To explore the ecological role of indole and skatole in the biology of blood-feeding  
168 mosquitoes, i.e., to determine whether these receptors may operate in a non-animal host seeking context, we  
169 have pharmacologically tested the responses of the OR2 and OR10 homologs from the strict-nectar feeding  
170 mosquito *T. amboinensis*. Our criteria for determining functional orthology included both pharmacological  
171 sensitivity and selectivity properties. On both accounts, we provide evidence that TaOR2 and TaOR10 are  
172 functional orthologs of their counterparts from blood-feeding mosquito species, as they are highly sensitive  
173 (nanomolar range EC<sub>50</sub> values) and narrowly tuned (kurtosis values) to indole and skatole, respectively.

174 While, the biological significance between these two receptors in terms of tuning breadth remains  
175 unresolved, the nanomolar level sensitivity of these receptors do suggest cognate relationships between these  
176 pairs. TaOR2 and TaOR10 exhibit high-level of sensitivity (nM range) among *T. amboinensis* ORs. For  
177 comparison, the EC<sub>50</sub> value for (*R*)-1-octen-3-ol in relation to TaOR8 is 401 nM (Dekel et al., 2016a), about  
178 4 times higher than TaOR2-indole and TaOR10-skatole interactions. The high sensitivity of TaOR2 and  
179 TaOR10 towards indole and skatole underscores their fundamental ecological significance.

180 TaOR10 exhibited outstanding specificity towards skatole, second to OR8 towards (*R*)-1-octen-3-ol  
181 (Bohbot and Dickens, 2009; Dekel et al., 2016a). Using a panel of 29 compounds identical to the ones tested  
182 here but excluding skatole, we find that the kurtosis value ( $k = 29$ ) for TaOR8 was maximal akin to TaOR10.



183 (R)-1-octen-3-ol was 30.3 times more potent than the next most activating odorant. Such ligand specificity is  
184 suggestive of the ecological significance of this odorant. Additionally, such a high degree of specificity may  
185 reflect an adaptation for high signal to noise ratio at the peripheral level (Lu et al., 2007).

186 We have provided evidence that TaOR2 and TaOR10 share the same function as their counterparts from  
187 the blood-feeding mosquitoes *Ae. aegypti*, *An. gambiae* (Bohbot et al., 2011; Bohbot and Dickens, 2012;  
188 Wang et al., 2010) and *Culex quinquefasciatus* (Hughes et al., 2010; Pelletier et al., 2010). In *Toxorhynchites*  
189 sp., these receptors may mediate oviposition site selection (Collins and Blackwell, 2002) and exhibit sensitive  
190 physiological responses (Collins and Blackwell, 1998). Our findings exclude the role of indole and skatole in  
191 animal-host seeking as far as *T. amboinensis* is concerned and underscore the need to decipher the role(s) of  
192 these compounds in blood-feeding mosquitoes using detailed behavioral studies. The unusual sequence and  
193 functional conservations of OR2 and OR10 during mosquito evolution reflect the importance of indole and  
194 skatole to mosquito ecology and behavior. Indeed, not only do adults detect indole but the larva antennae of  
195 *Ae. aegypti* also express *Or2*, suggesting a separate ecological role of this compound in aquatic environments.  
196 The prevalence and abundance of indole and skatole present us with a challenge that is to understand their  
197 potential role in foraging, mate searching, habitat finding and oviposition site seeking. In addition, odorants  
198 can elicit different activities from different mosquito species (Xu et al., 2015), which means that indole and  
199 skatole may operate in different contexts within and between species.

200 The conservation and central role of the mosquito-specific *Or2* and *Or10* genes may be leveraged for the  
201 development of future mosquito control agents, including receptor (agonists and antagonists) and behavioral  
202 modulators (repellents and attractants). However, comprehensive behavioral studies are wanting to develop  
203 such tools for vector population control and personal protection.

204

## 205 **Figure legends**

206 **Figure 1. Indolergic receptors may operate in multiple ecological contexts.** (A) Genes encoding the *Aedes*  
207 *aegypti* odorant receptors 2 (AaOR2) and 10 (AaOR10) proteins are expressed in the adult antennae and are  
208 respectively activated by indole and skatole. These two compounds have been linked to oviposition site

209 selection and animal-host seeking in *Aedes aegypti*. Indole is also a major component of flower scents and  
210 may play a role in plant-host attraction. (B) Phylogenetic analysis of the candidate indolergic receptor from  
211 *Toxorhynchites amboinensis*. Amino-acid identity between OR2 and OR10 are colored in blue and red,  
212 respectively. Amino-acid differences are shown in black. AaOR9 was used as an outgroup.

213

214 **Figure 2. TaOR2 and TaOR10 are highly sensitive to indole and skatole, respectively.** (A) Representative  
215 current traces elicited by increasing concentrations of indole and skatole recorded from *Xenopus* oocytes co-  
216 expressing the *TaOR2* or *TaOr10* and *TaORco* receptor complexes. (B) Concentration-response relationships  
217 of TaOR2+TaORco and TaOR10+TaORco elicited by indole (blue curve) and skatole (red curve). Responses  
218 were normalized to the maximum amplitude response. Extrapolated EC<sub>50</sub> values are shown with yellow  
219 circles. Lower and upper EC<sub>50</sub> values (standard error) are in upper case. Asterisks represent statistically  
220 significant differences of the OR responses (one-way ANOVA followed by Tukey's multiple comparisons  
221 post test; \*\*\*\*P < 0.0001). Odorant concentrations were plotted on a logarithmic scale. Each point represents  
222 the mean and error bars indicate s.e.m.

223

224 **Figure 3. TaOR2 and TaOR10 are narrowly tuned.** (A) Representative current trace elicited by indole,  
225 skatole, (±)-1-octen-3-ol (1), heptaldehyde (2), propyl-acetate (3), 3-octanone (4), benzaldehyde (5) and  
226 octopamine (6) recorded from *Xenopus* oocytes co-expressing the *TaOr2* or *TaOr10* and the *TaORco* receptor  
227 complexes. (B) TaOR2 and TaOR10 are narrowly tuned (k, kurtosis value) to indole and skatole, respectively  
228 (one-way ANOVA followed by Dunnet post-test; \*\*\*\*P < 0.0001). Mean responses (± s.e.m., n = 6) to 90  
229 nM of 30 odorants were normalized to indole or skatole.

230

### 231 **Supplemental information**

232 **Supplementary Figure 1.** (A) Amino-acid sequence alignment of OR2 and OR10 between *Toxorhynchites*  
233 *amboinensis* and *Aedes aegypti*. (B) Percentage of amino-acid sequence identity.

234

235 **Supplemental Figure 2.** The order of odorant administration does not affect the relative receptor activity.  
236 Representative current traces elicited by 90 nM of indole, skatole, ( $\pm$ )-1-octen-3-ol (1), heptaldehyde (2),  
237 propyl-acetate (3), 3-octanone (4), benzaldehyde (5) and octopamine (6) recorded from *Xenopus* oocytes co-  
238 expressing the *TaOr2* and the *TaORco* receptor complex.

239

## 240 Acknowledgements

241 The authors They are grateful to Prof. Eitan Reuveny and Dr. Izhar Karbat from the Weizmann Institute of  
242 Science for their help with the frog oocytes. This work was supported by the by the Israel Science Foundation  
243 [grant number 1990/16].

244

## 245 References

- 246 Baak-Baak, C.M., Rodríguez-Ramírez, A.D., García-Rejón, J.E., Ríos-Delgado, S., Torres-Estrada, J.L.,  
247 2013. Development and laboratory evaluation of chemically-based baited ovitrap for the monitoring of  
248 *Aedes aegypti*. *J Vector Ecol* 38, 175–181. doi:10.1111/j.1948-7134.2013.12024.x
- 249 Beehler, J.W., Beehler, J., Millar, J., Millar, J.G., Mulla, M.S., Mulla, M., 1994. Field evaluation of  
250 synthetic compounds mediating oviposition in *Culex* mosquitoes (Diptera: Culicidae). *J Chem Ecol* 20,  
251 281-291
- 252 Bernier, U., Kline, D., Barnard, D., Schreck, C., Yost, R., 2000. Analysis of human skin emanations by gas  
253 chromatography/mass spectrometry. 2. Identification of volatile compounds that are candidate  
254 attractants for yellow fever mosquito (*Aedes aegypti*). *Analytical Chemistry A* 72: 747-756.
- 255 Bernier, U.R., Kline, D.L., Schreck, C.E., Yost, R.A., Barnard, D.R., 2002. Chemical analysis of human  
256 skin emanations: comparison of volatiles from humans that differ in attraction of *Aedes aegypti*  
257 (Diptera: Culicidae). *J Am Mosq Control Assoc* 18, 186–195.
- 258 Blackwell, A., Johnson, S., 2000. Electrophysiological investigation of larval water and potential  
259 oviposition chemo-attractants for *Anopheles gambiae* s.s. *Ann Trop Med Parasitol* 94, 389–398.
- 260 Blackwell, A., Mordue, A., Hansson, B., 1993. A behavioural and electrophysiological study of oviposition  
261 cues for *Culex quinquefasciatus*. *Physiological Entomology* 18, 343-348.
- 262 Bohbot, J.D., Dickens, J.C., 2012. Odorant receptor modulation: Ternary paradigm for mode of action of  
263 insect repellents. *Neuropharmacology* 62, 2086–2095. doi:10.1016/j.neuropharm.2012.01.004
- 264 Bohbot, J.D., Dickens, J.C., 2009. Characterization of an enantioselective odorant receptor in the yellow  
265 fever mosquito *Aedes aegypti*. *PLoS ONE* 4, e7032. doi:10.1371/journal.pone.0007032
- 266 Bohbot, J.D., Jones, P.L., Wang, G., Pitts, R.J., Pask, G.M., Zwiebel, L.J., 2011. Conservation of indole  
267 responsive odorant receptors in mosquitoes reveals an ancient olfactory trait. *Chem Senses* 36, 149–  
268 160. doi:10.1093/chemse/bjq105
- 269 Bohbot, J.D., Pitts, R.J., 2015. The narrowing olfactory landscape of insect odorant receptors. *Frontiers in*  
270 *Ecology and Evolution* 3, 39.
- 271 Carey, A.F., Wang, G., Su, C.-Y., Zwiebel, L.J., Carlson, J.R., 2010. Odorant reception in the malaria  
272 mosquito *Anopheles gambiae*. *Nature* 464, 66–71. doi:10.1038/nature08834
- 273 Collins, L., Blackwell, A., 2002. Olfactory cues for oviposition behavior in *Toxorhynchites moctezuma* and  
274 *Toxorhynchites amboinensis* (Diptera: Culicidae). *J Med Entomol* 39, 121–126.

- 275 Collins, L.E., Blackwell, A., 1998. Electroantennogram studies of potential oviposition attractants for  
276 *Toxorhynchites moctezuma* and *T. amboinensis* mosquitoes. *Physiological Entomology* 23, 214–219.
- 277 Cork, A., 1996. Olfactory basis of host location by mosquitoes and other haematophagous Diptera., in:  
278 Olfaction in Mosquito Host Interactions. Ciba Foundation Symposium 200, pp. 71–88.
- 279 Davis, E.E., Bowen, M.F., 1994. Sensory physiological basis for attraction in mosquitoes. *J Am Mosq*  
280 *Control Assoc* 10, 316–325.
- 281 Dekel, A., Pitts, R.J., Yakir, E., Bohbot, J.D., 2016a. Evolutionarily conserved odorant receptor function  
282 questions ecological context of octenol role in mosquitoes. *Sci Rep* 6, 37330. doi:10.1038/srep37330
- 283 Dekel, A., Pitts, R.J., Yakir, E., Bohbot, J.D., 2016b. Evolutionarily conserved odorant receptor function  
284 questions ecological context of octenol role in mosquitoes. *Sci Rep* 6, 86. doi:10.1038/srep37330
- 285 Du, Y., Millar, J., 1999. Electroantennogram and oviposition bioassay responses of *Culex quinquefasciatus*  
286 and *Culex tarsalis* (Diptera: Culicidae) to chemicals in odors from Bermuda grass infusions. *J Med*  
287 *Entomol* 36, 158–166.
- 288 Garner, C.E., Smith, S., de Lacy Costello, B., White, P., Spencer, R., Probert, C.S.J., Ratcliffe, N.M., 2007.  
289 Volatile organic compounds from feces and their potential for diagnosis of gastrointestinal disease.  
290 *FASEB J* 21, 1675–1688. doi:10.1096/fj.06-6927com
- 291 Hughes, D.T., Pelletier, J., Luetje, C.W., Leal, W.S., 2010. Odorant receptor from the southern house  
292 mosquito narrowly tuned to the oviposition attractant skatole. *J Chem Ecol* 36, 797–800.  
293 doi:10.1007/s10886-010-9828-9
- 294 Jürgens, A., Dotterl, S., Liede-Schumann, S., Meve, U., 2010. Floral scent composition in early diverging  
295 taxa of Asclepiadoideae, and Secamonoideae (Apocynaceae). *South African Journal of Botany* 76, 749–  
296 761. doi:10.1016/j.sajb.2010.08.013
- 297 Knudsen, J.T., Eriksson, R., Gershenzon, J., Ståhl, B., 2006. Diversity and Distribution of Floral Scent. *The*  
298 *Botanical Review* 72, 1–120. doi:10.1663/0006-8101(2006)72[1:DADOFS]2.0.CO;2
- 299 Kumar, S., Stecher, G., Tamura, K., 2016. MEGA7: Molecular evolutionary genetics analysis version 7.0  
300 for bigger datasets. *Molecular biology and evolution* 33, 1870–1874. doi:10.1093/molbev/msw054
- 301 Lindh, J.M., Kannaste, A., Knols, B.G.J., Faye, I., Borg-Karlson, A.-K., 2008. Oviposition responses of  
302 *anopheles gambiae* s.s. (diptera: culicidae) and identification of volatiles from bacteria-containing  
303 solutions. *J Med Entomol* 45, 1039–1049. doi:10.1093/jmedent/45.6.1039
- 304 Lu, T., Qiu, Y.T., Wang, G., Kwon, J.Y., Rutzler, M., Kwon, H.-W., Pitts, R.J., Van Loon, J.J.A., Takken,  
305 W., Carlson, J.R., Zwiebel, L.J., 2007. Odor coding in the maxillary palp of the malaria vector mosquito  
306 *Anopheles gambiae*. *Curr Biol* 17, 1533–1544. doi:10.1016/j.cub.2007.07.062
- 307 Mboera, L., Takken, W., 1999. Odour-mediated host preference of *Culex quinquefasciatus* in Tanzania.  
308 *Entomologia Experimentalis et Applicata* 96:167-175 92, 83–88.
- 309 Meijerink, J., Braks, M., Brack, A., Adam, W., Dekker, T., Posthumus, M., Beek, T., Loon, J., 2000.  
310 Identification of olfactory stimulants for *Anopheles gambiae* from human sweat samples. *Journal of*  
311 *Chemical Ecology* 26(6) 1367-1382.
- 312 Meijerink, J., Braks, M.A., Van Loon, J.J., 2001. Olfactory receptors on the antennae of the malaria  
313 mosquito *Anopheles gambiae* are sensitive to ammonia and other sweat-borne components. *J Insect*  
314 *Physiol* 47, 455–464.
- 315 Millar, J.G., Chaney, J.D., Beehler, J.W., Mulla, M.S., 1994. Interaction of the *Culex quinquefasciatus* egg  
316 raft pheromone with a natural chemical associated with oviposition sites. *J Am Mosq Control Assoc* 10,  
317 374–379.
- 318 Millar, J.G., Chaney, J.D., Mulla, M.S., 1992. Identification of oviposition attractants for *Culex*  
319 *quinquefasciatus* from fermented Bermuda grass infusions. *J Am Mosq Control Assoc* 8, 11–17.
- 320 Mordue, A.J., Blackwell, A., Hansson, B.S., Wadhams, L.J., Pickett, J.A., 1992. Behavioural and  
321 electrophysiological evaluation of oviposition attractants for *Culex quinquefasciatus* say (Diptera:  
322 Culicidae). *Cell Mol Life Sci* 48, 1109–1111. doi:10.1007/BF01947999
- 323 Nakamura, T., Yamada, K.D., Tomii, K., Katoh, K., 2018, n.d. Parallelization of MAFFT for large-scale  
324 multiple sequence alignments. *Bioinformatics* 34, 2490-2492.

- 325 Nyasembe, V.O., Tchouassi, D.P., Pirk, C.W.W., Sole, C.L., Torto, B., 2018. Host plant forensics and  
326 olfactory-based detection in Afro-tropical mosquito disease vectors. PLoS Negl Trop Dis 12, e0006185.  
327 doi:10.1371/journal.pntd.0006185
- 328 Pelletier, J., Hughes, D.T., Luetje, C.W., Leal, W.S., 2010. An odorant receptor from the southern house  
329 mosquito *Culex pipiens quinquefasciatus* sensitive to oviposition attractants. PLoS ONE 5, e10090.  
330 doi:10.1371/journal.pone.0010090
- 331 Qiu, Y.T., Van Loon, J.J.A., Takken, W., Meijerink, J., Smid, H.M., 2006. Olfactory Coding in Antennal  
332 Neurons of the Malaria Mosquito, *Anopheles gambiae*. Chem Senses 31, 845–863.  
333 doi:10.1093/chemse/bjl027
- 334 Siju, K.P., Hill, S.R., Hansson, B.S., Ignell, R., 2010. Influence of blood meal on the responsiveness of  
335 olfactory receptor neurons in antennal sensilla trichodea of the yellow fever mosquito, *Aedes aegypti*. J  
336 Insect Physiol 56, 659–665. doi:10.1016/j.jinsphys.2010.02.002
- 337 Smith, B.N., Meeuse, B.J., 1966. Production of volatile amines and skatole at anthesis in some arum lily  
338 species. Plant Physiol 41, 343–347.
- 339 Takken, W., Knols, B.G., 1999. Odor-mediated behavior of Afrotropical malaria mosquitoes. Annu Rev  
340 Entomol 44, 131–157. doi:10.1146/annurev.ento.44.1.131
- 341 Wang, G., Carey, A.F., Carlson, J.R., Zwiebel, L.J., 2010. Molecular basis of odor coding in the malaria  
342 vector mosquito *Anopheles gambiae*. Proc Natl Acad Sci USA 107, 4418–4423.  
343 doi:10.1073/pnas.0913392107
- 344 Xu, P., Zhu, F., Buss, G.K., Leal, W.S., 2015. 1-Octen-3-ol - the attractant that repels. F1000Res 4, 156.  
345 doi:10.12688/f1000research.6646.1
- 346 Yokoyama, M.T., Carlson, J.R., 1979. Microbial metabolites of tryptophan in the intestinal tract with  
347 special reference to skatole. Am J Clin Nutr 32, 173–178. doi:10.1093/ajcn/32.1.173
- 348 Zhou, X., Rinker, D.C., Pitts, R.J., Rokas, A., Zwiebel, L.J., 2014. Divergent and conserved elements  
349 comprise the chemoreceptive repertoire of the non-blood feeding mosquito *Toxorhynchites*  
350 *amboinensis*. Genome Biol Evol 6, 2883–2896. doi:10.1093/gbe/evu231
- 351 Zwiebel, L.J., Takken, W., 2004. Olfactory regulation of mosquito–host interactions. Insect Biochemistry  
352 and Molecular Biology 34, 645–652. doi:10.1016/j.ibmb.2004.03.017

A

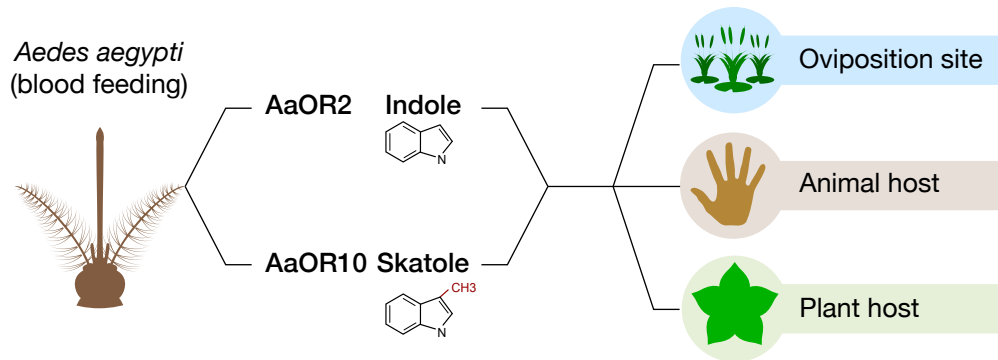

B

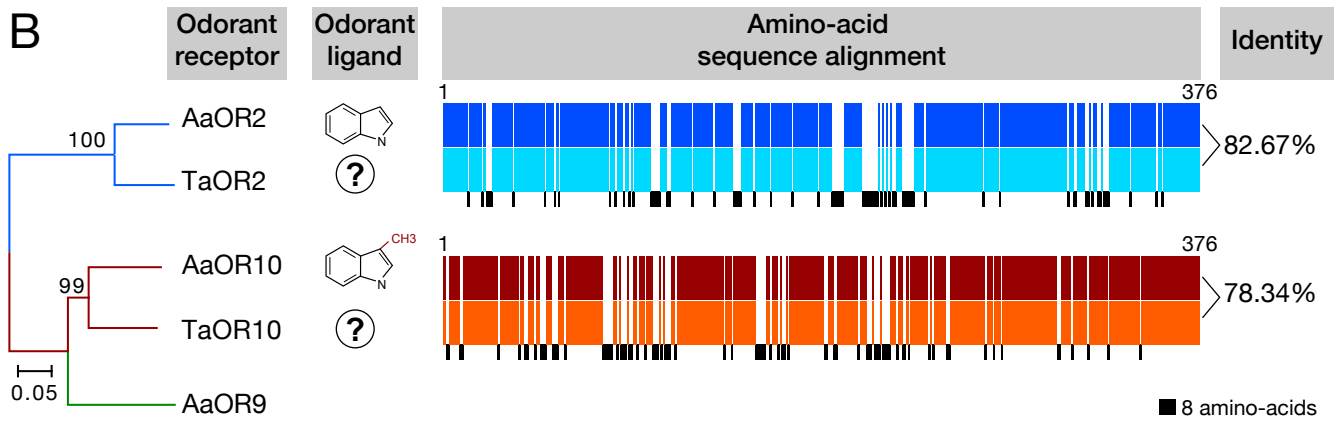

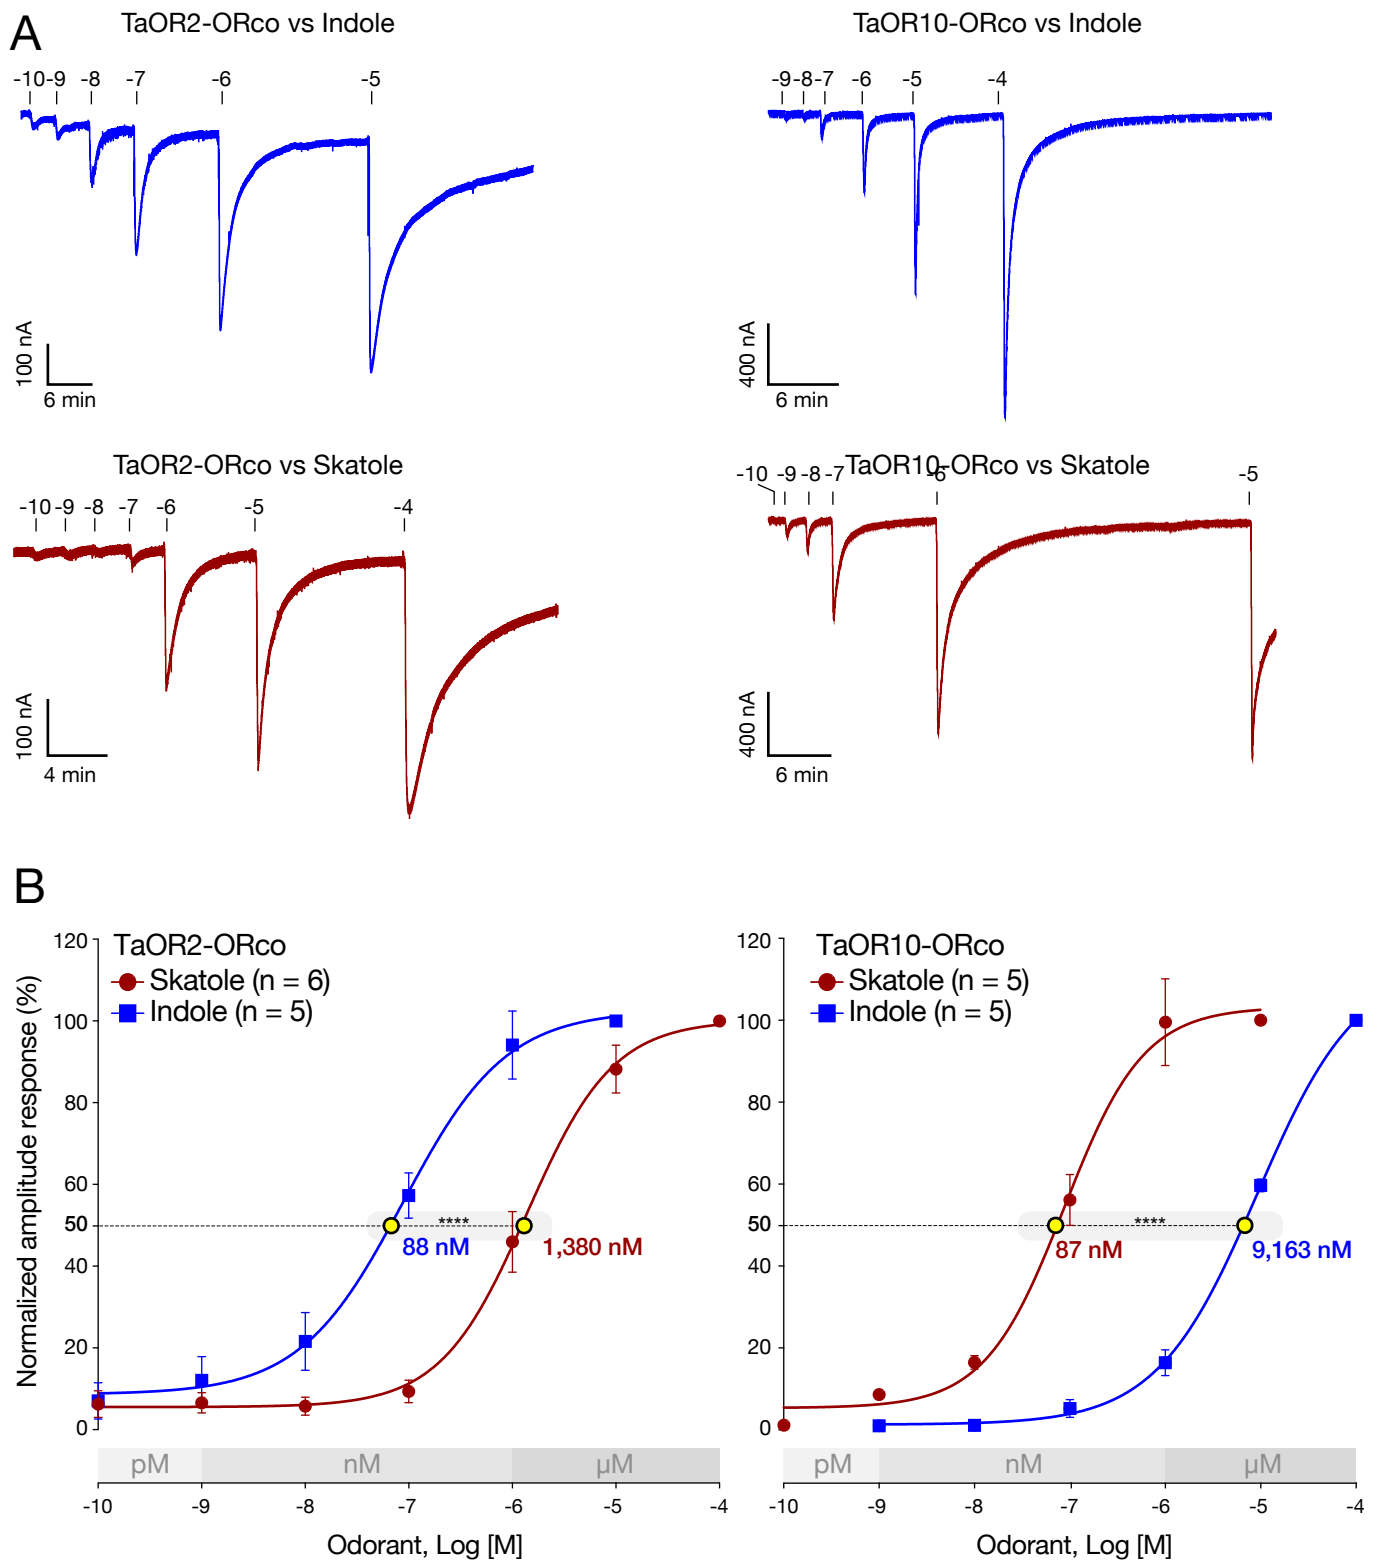



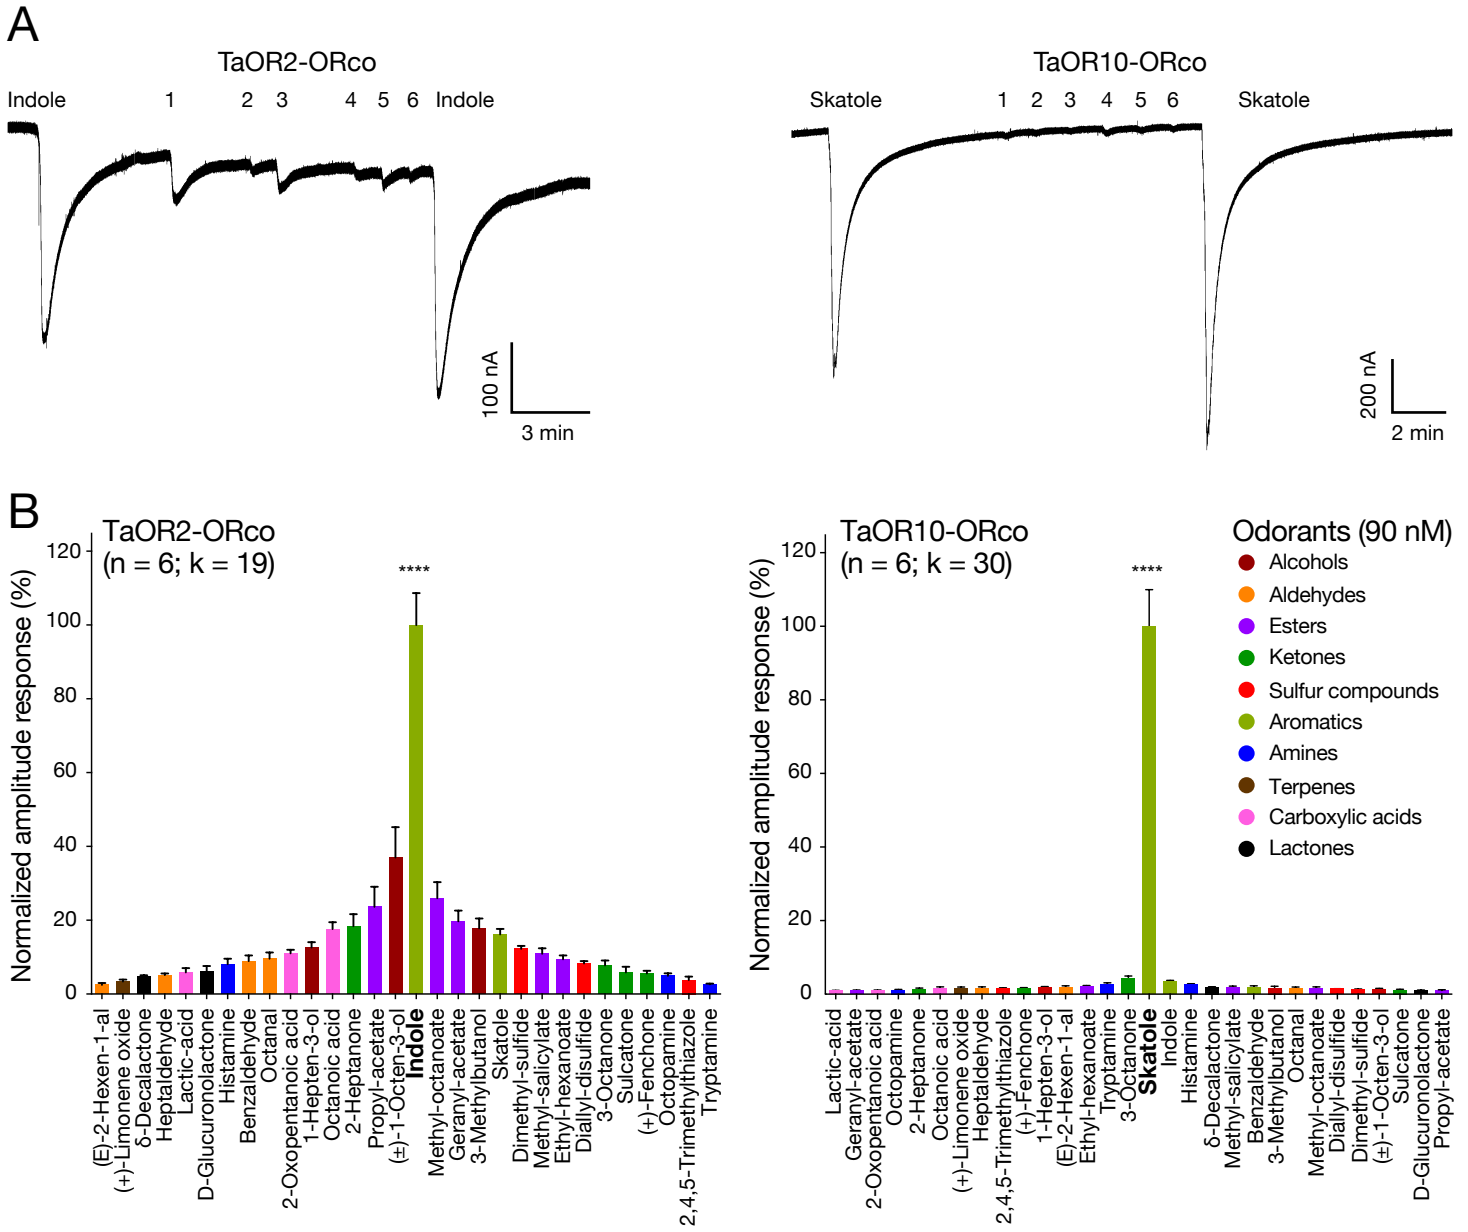

Source: https://www.biorxiv.org/content/10.1101/513044v1.full.pdf
